# Supplementary material for: A technique for the measurement of organic aerosol hygroscopicity, oxidation level, and volatility distributions
Source: Copernicus journal article supplement (doi:10.5194/amt-10-4865-2017), 2017-12-13
Supplement: Supplementary file 1 [file amt-10-4865-2017-supplement.pdf]

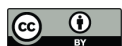

## *Supplement of*

# **A technique for the measurement of organic aerosol hygroscopicity, oxidation level, and volatility distributions**

**Kerrigan P. Cain and Spyros N. Pandis**

*Correspondence to:* Spyros N. Pandis ([spyros@andrew.cmu.edu](mailto:spyros@andrew.cmu.edu))

The copyright of individual parts of the supplement might differ from the CC BY 4.0 License.

## 1. TD loss fraction

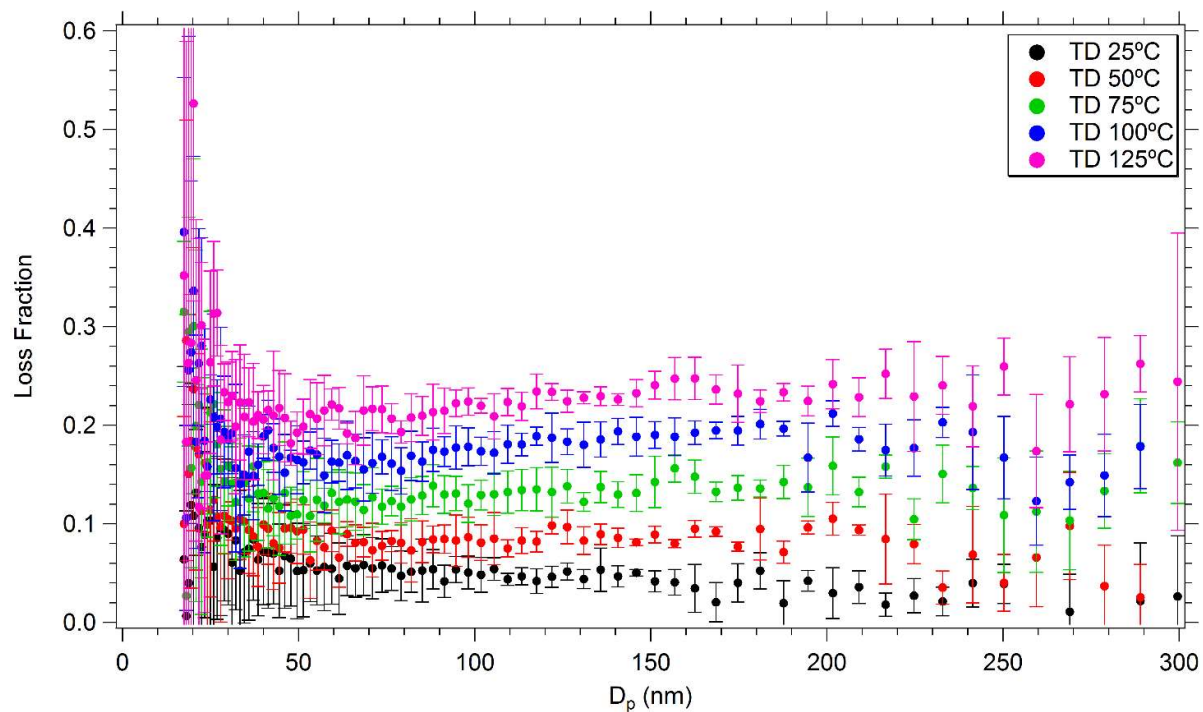

**Figure S1.** Loss fraction in the TD as a function of particle size and temperature. The colors represent different TD temperatures. The error bars represent one standard deviation of the mean.

## 2. Results and analysis of Experiment 2

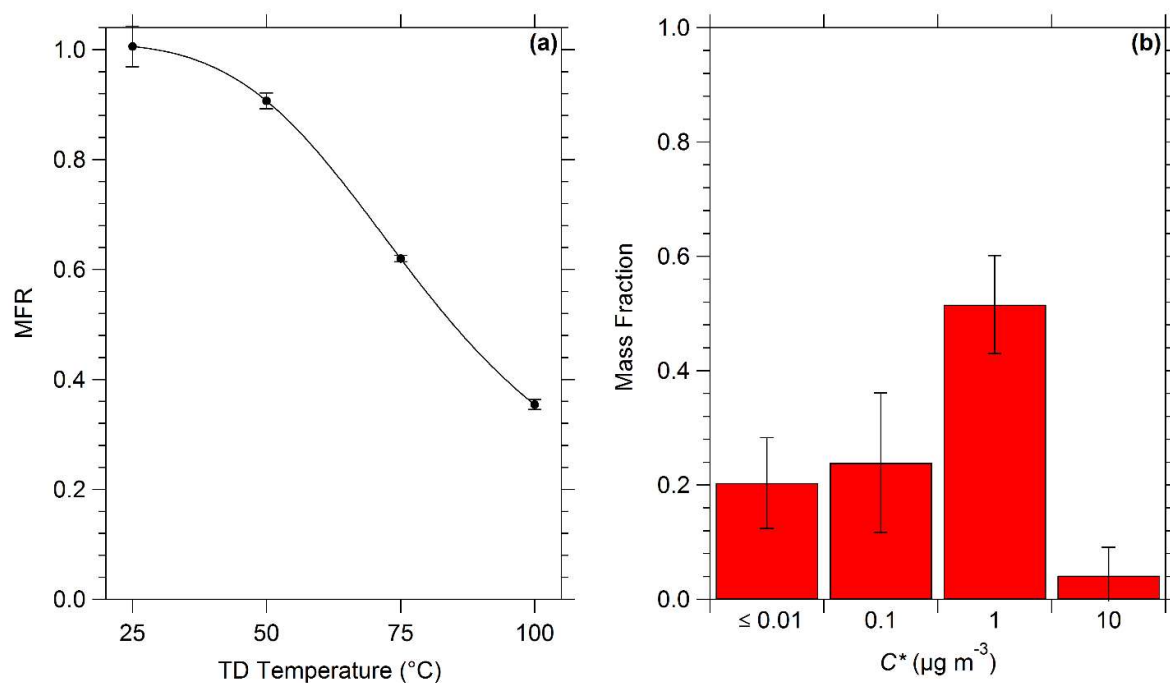

**Figure S2.** (a) Thermogram, corrected for losses in the TD, for Experiment 2 with the fit from the TD model. The error bars represent one standard deviation of the mean. (b) SOA volatility distribution for Experiment 2 using the 1D-VBS framework. The error bars correspond to one standard deviation of the solution calculated by the model.

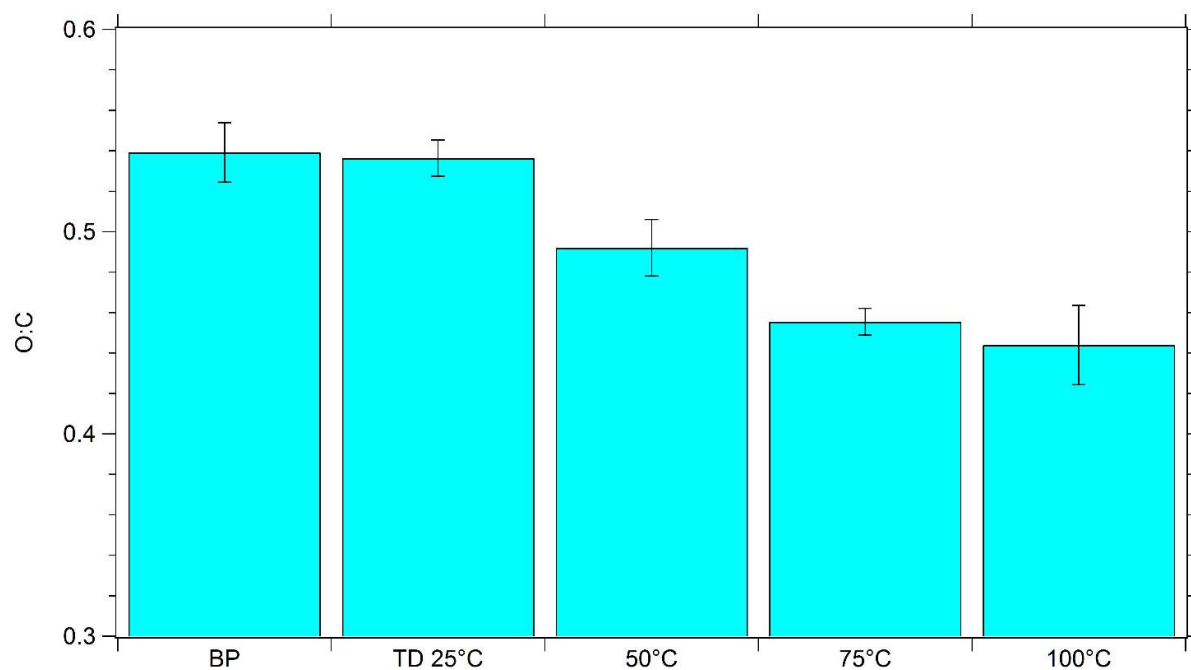

**Figure S3.** The average O:C ratio observed through the BP and several TD temperatures for Experiment 2. The error bars represent one standard deviation of the mean. The O:C ratios at a TD temperature of 50°C and greater were statistically smaller than the values at the BP and the TD at 25°C.

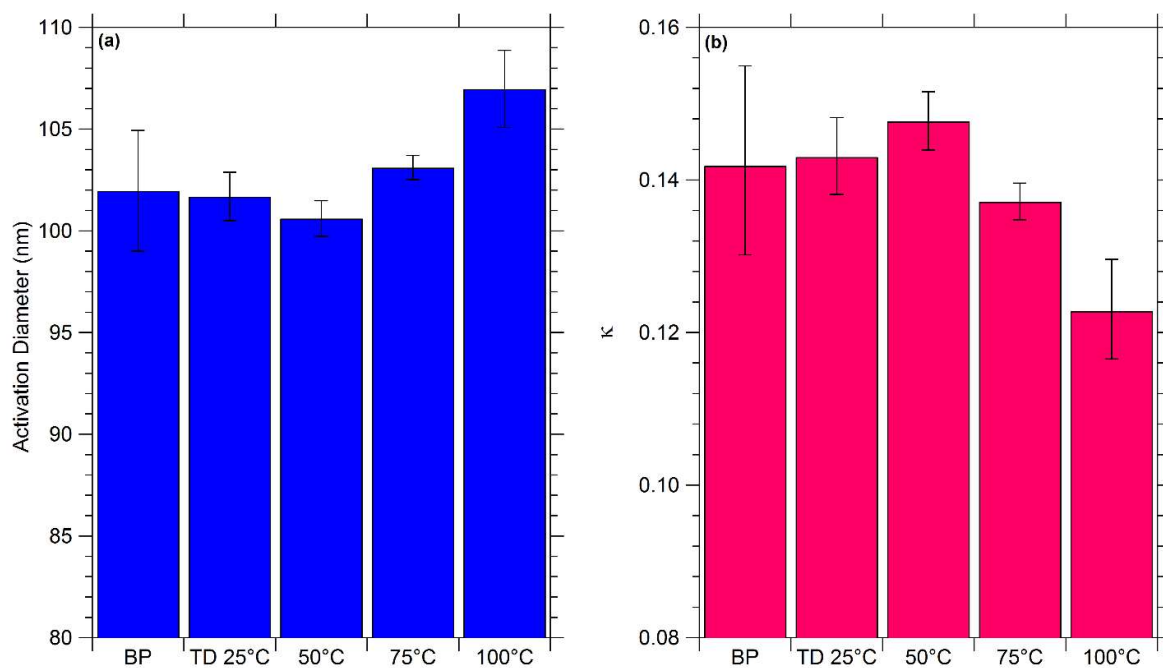

**Figure S4.** (a) The average activation diameter observed at 0.3 % supersaturation in the CCNC for Experiment 2. The error bars represent one standard deviation of the mean. (b) The estimated  $\kappa$  values for Experiment 2. The error bars were obtained by estimating the  $\kappa$  at  $\pm$  one standard deviation of the average activation diameter measured. The values at a TD temperature of 100°C was statistically different from the values at the BP and the TD at 25°C.

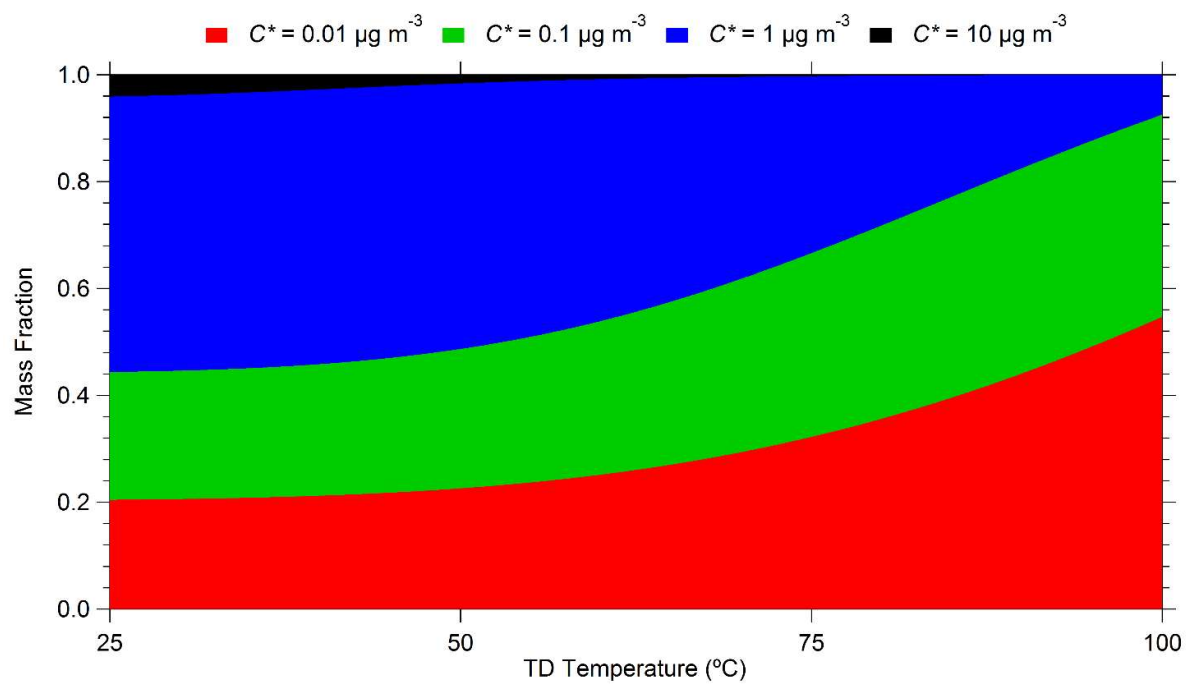

**Figure S5.** The estimated mass fractions for each volatility bin as a function of TD temperature for Experiment 2. Red represents the  $C^* = 0.01 \mu\text{g m}^{-3}$  bin, green the  $C^* = 0.1 \mu\text{g m}^{-3}$  bin, blue the  $C^* = 1 \mu\text{g m}^{-3}$  bin, and black the  $C^* = 10 \mu\text{g m}^{-3}$  bin.

### 3. Results and analysis of Experiment 3

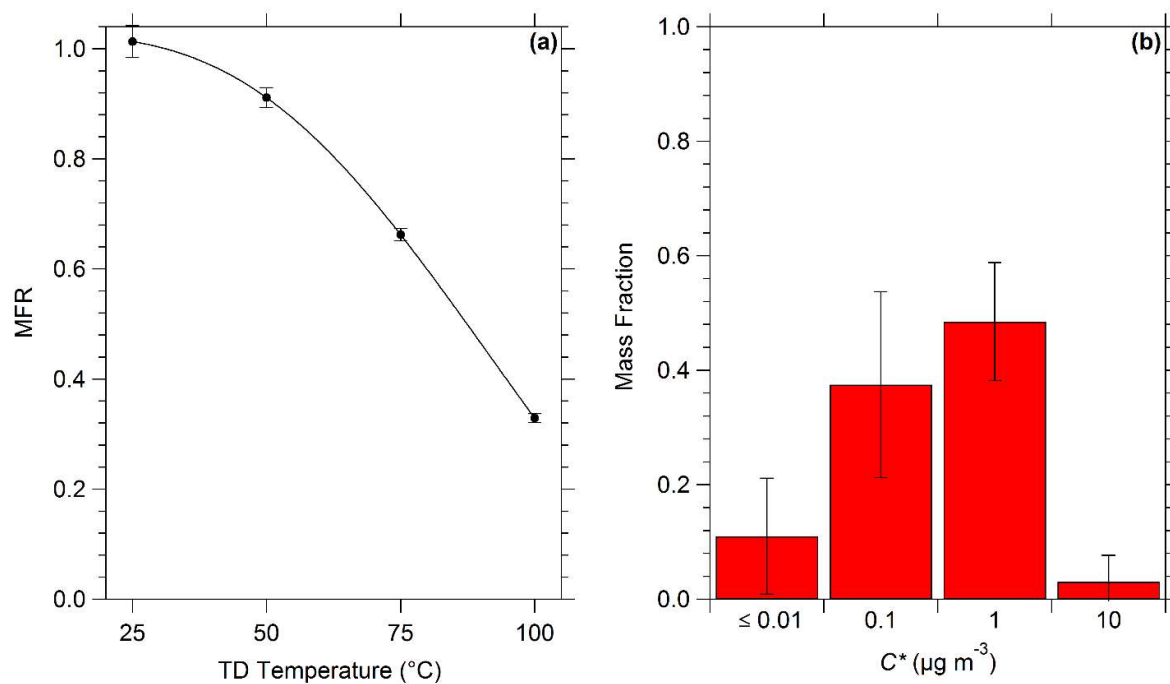

**Figure S6.** (a) Thermogram, corrected for losses in the TD, for Experiment 3 with the fit from the TD model. The error bars represent one standard deviation of the mean. (b) SOA volatility distribution for Experiment 3 using the 1D-VBS framework. The error bars correspond to one standard deviation of the solution calculated by the model.

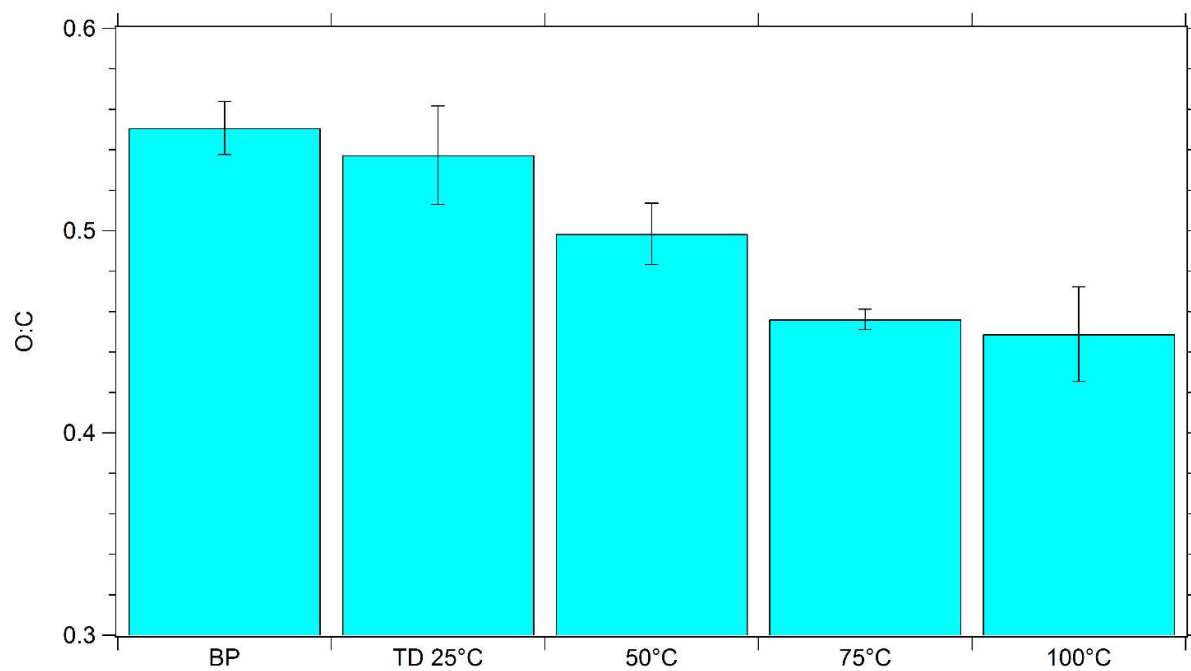

**Figure S7.** The average O:C ratio observed through the BP and several TD temperatures for Experiment 3. The error bars represent one standard deviation of the mean. The O:C ratios at a TD temperature of 50°C and greater were statistically smaller than the values at the BP and the TD at 25°C.



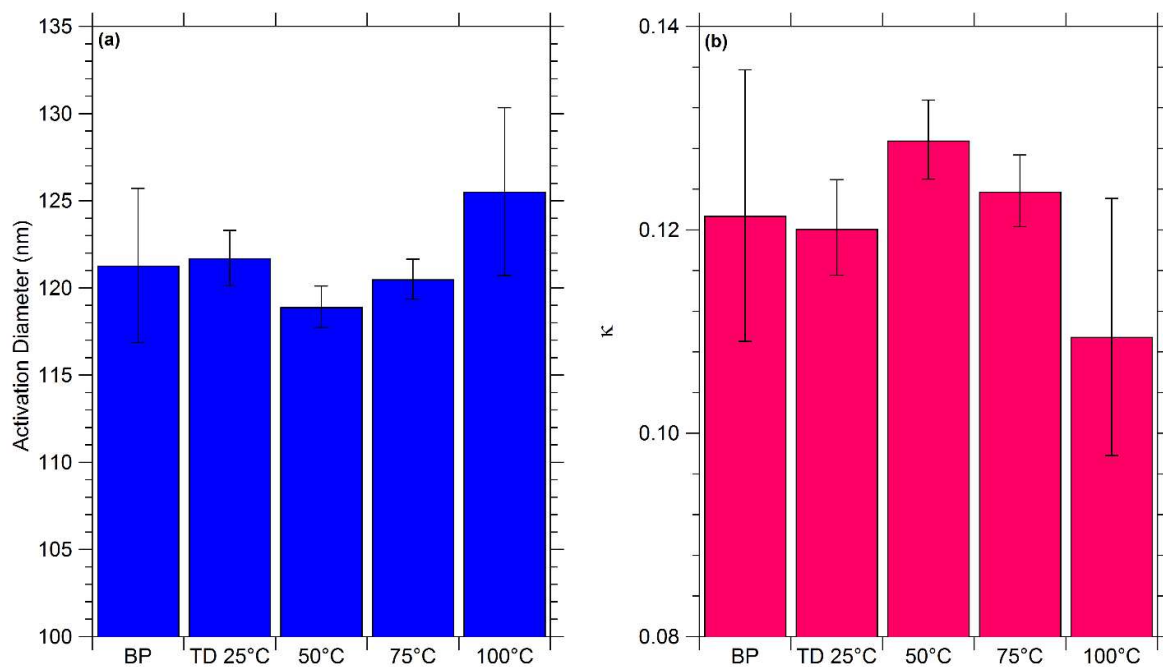

**Figure S8.** (a) The average activation diameter observed at 0.25 % supersaturation in the CCNC for Experiment 3. The error bars represent one standard deviation of the mean. (b) The estimated  $\kappa$  values for Experiment 3. The error bars were obtained by estimating the  $\kappa$  at  $\pm$  one standard deviation of the average activation diameter measured.

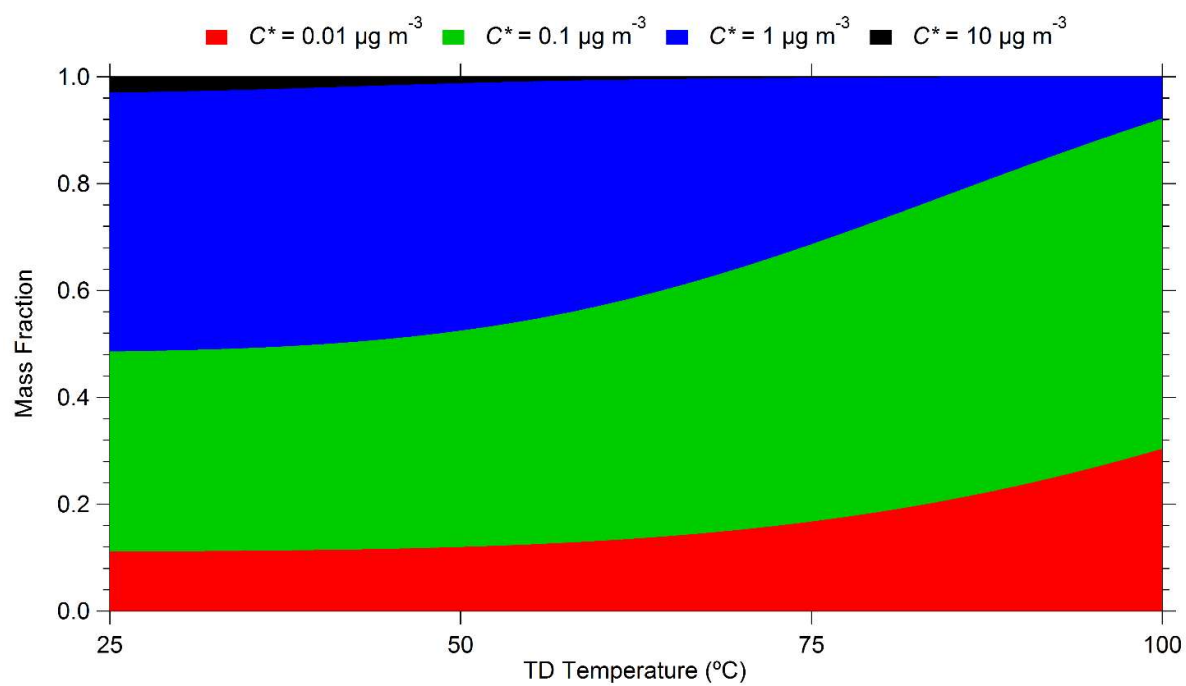

**Figure S9.** The estimated mass fractions for each volatility bin as a function of TD temperature for Experiment 3. Red represents the  $C^* = 0.01 \mu\text{g m}^{-3}$  bin, green the  $C^* = 0.1 \mu\text{g m}^{-3}$  bin, blue the  $C^* = 1 \mu\text{g m}^{-3}$  bin, and black the  $C^* = 10 \mu\text{g m}^{-3}$  bin.

#### 4. Results and analysis of Experiment 4

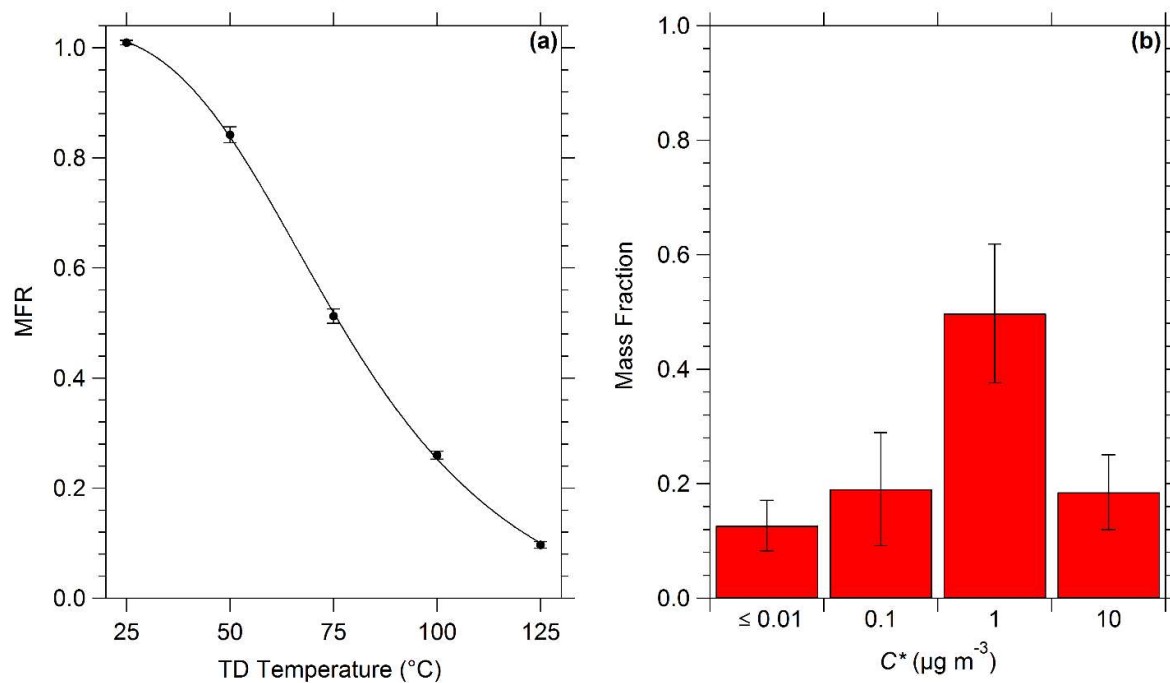

**Figure S10.** (a) Thermogram, corrected for losses in the TD, for Experiment 4 with the fit from the TD model. The error bars represent one standard deviation of the mean. (b) SOA volatility distribution for Experiment 4 using the 1D-VBS framework. The error bars correspond to one standard deviation of the solution calculated by the model.

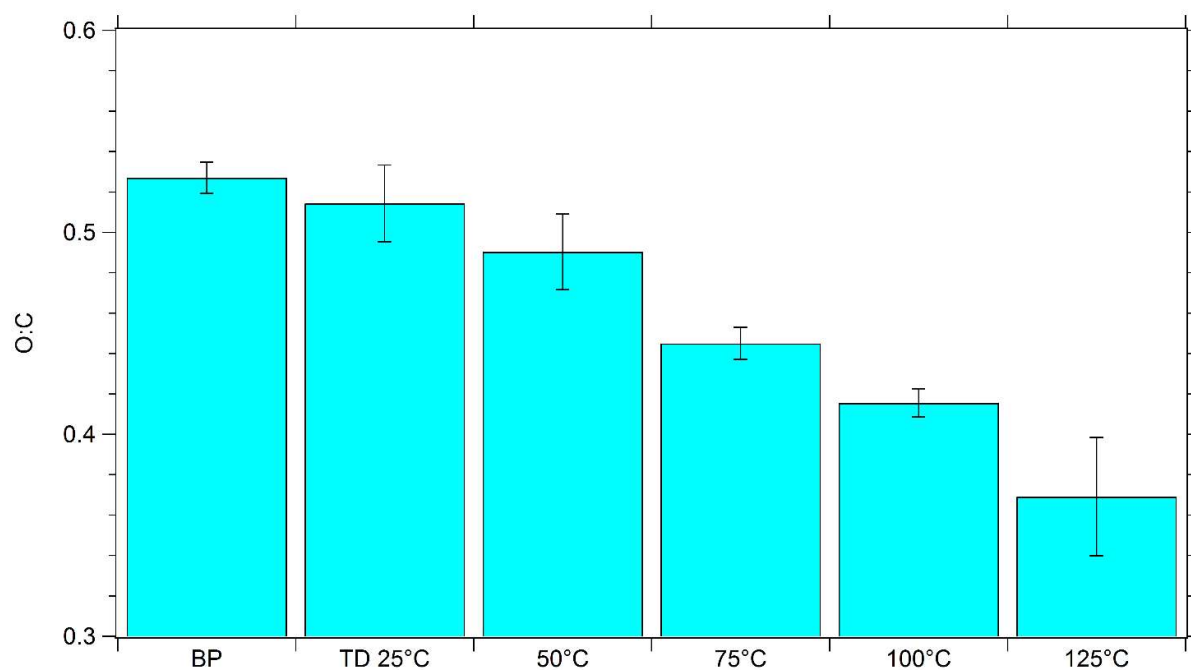

**Figure S11.** The average O:C ratio observed through the BP and several TD temperatures for Experiment 4. The error bars represent one standard deviation of the mean. The O:C ratios at a TD temperature of 50°C and greater were statistically smaller than the values at the BP and the TD at 25°C.

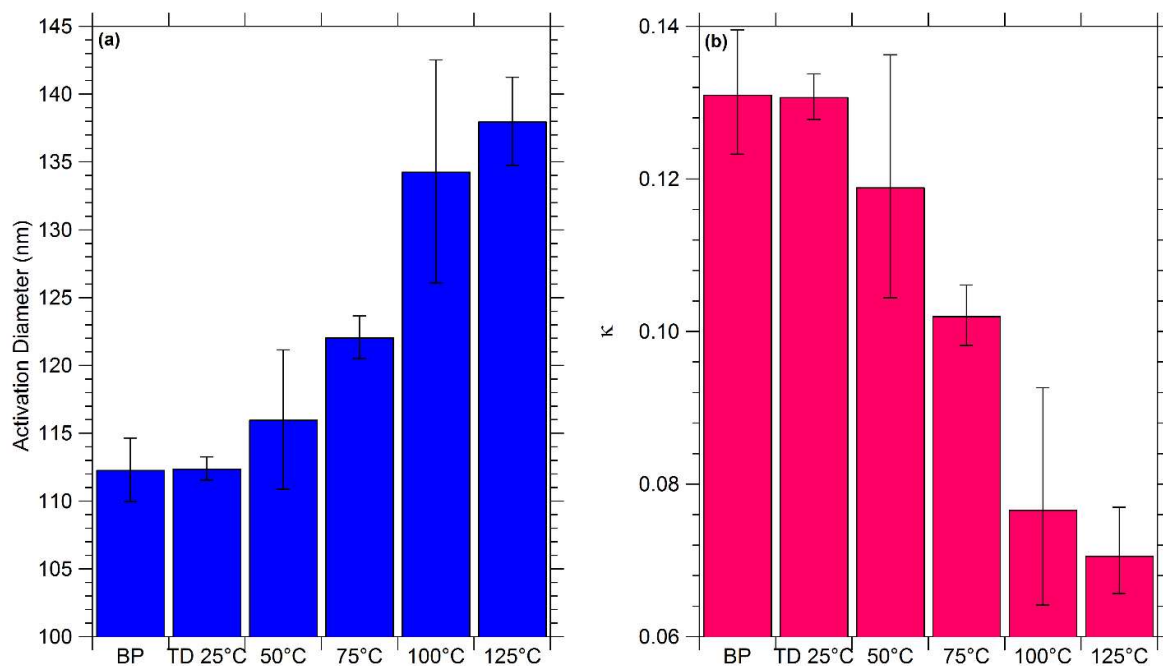

**Figure S12.** (a) The average activation diameter observed at 0.27 % supersaturation in the CCNC for Experiment 4. The error bars represent one standard deviation of the mean. (b) The estimated  $\kappa$  values for Experiment 4. The error bars were obtained by estimating the  $\kappa$  at  $\pm$  one standard deviation of the average activation diameter measured. The values at a TD temperature of 75°C and greater were statistically different from the values at the BP and the TD at 25°C. The SOA through the TD at 125°C did not have large enough particles to reach 50 % activation, so the activation diameter was extrapolated from the particles that activated.

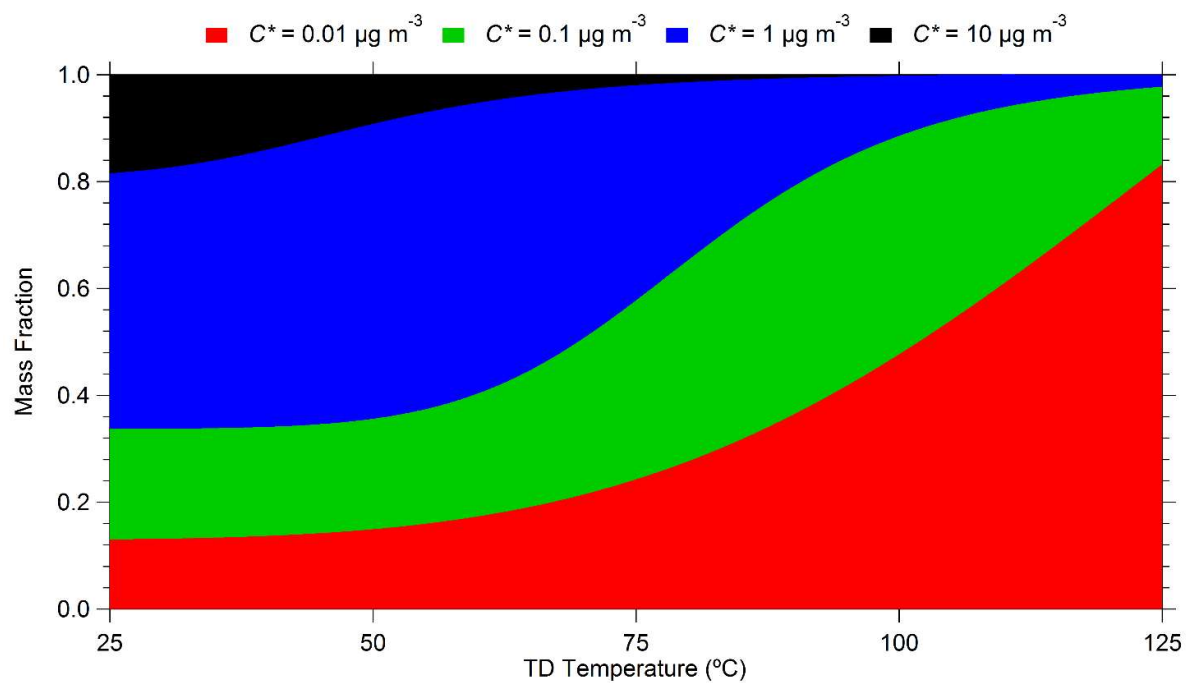

**Figure S13.** The estimated mass fractions for each volatility bin as a function of TD temperature for Experiment 4. Red represents the  $C^* = 0.01 \mu\text{g m}^{-3}$  bin, green the  $C^* = 0.1 \mu\text{g m}^{-3}$  bin, blue the  $C^* = 1 \mu\text{g m}^{-3}$  bin, and black the  $C^* = 10 \mu\text{g m}^{-3}$  bin.

## 5. O:C and $\kappa$ correlation

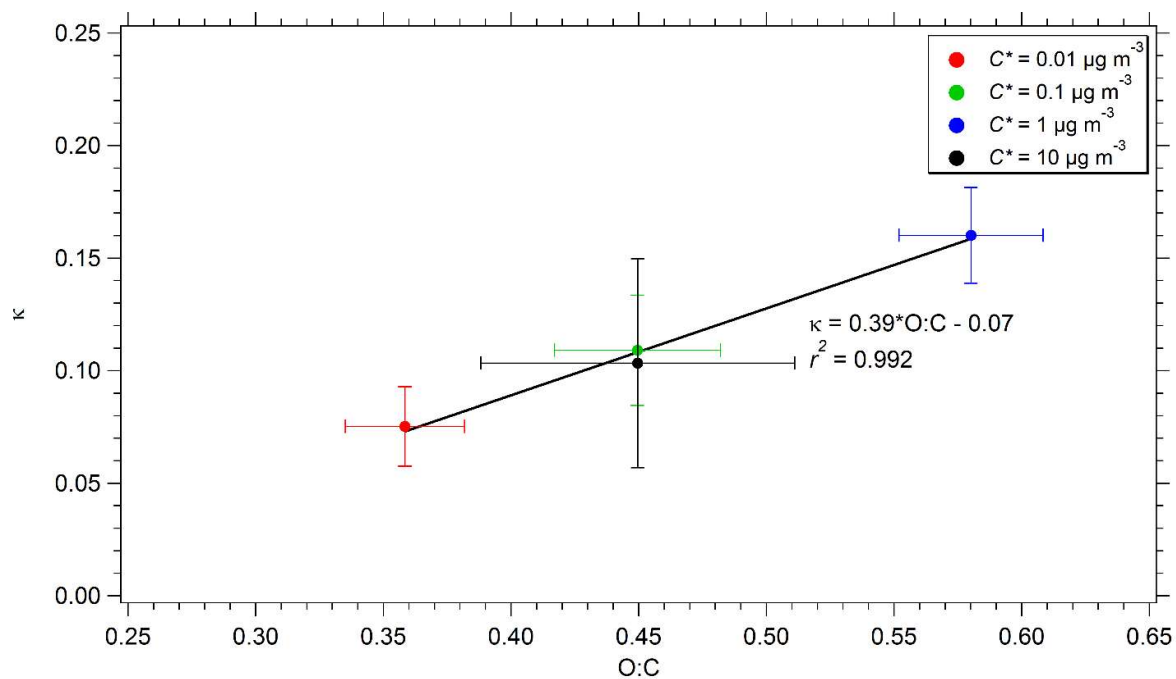

**Figure S14.** The  $\kappa$ 's plotted as a function of their corresponding O:C ratios for each volatility bin in Fig. 7. Red represents the  $C^* = 0.01 \mu\text{g m}^{-3}$  bin, green the  $C^* = 0.1 \mu\text{g m}^{-3}$  bin, blue the  $C^* = 1 \mu\text{g m}^{-3}$  bin, and black the  $C^* = 10 \mu\text{g m}^{-3}$  bin.

## 6. Predicted versus measured $\kappa$ 's for Experiment 2

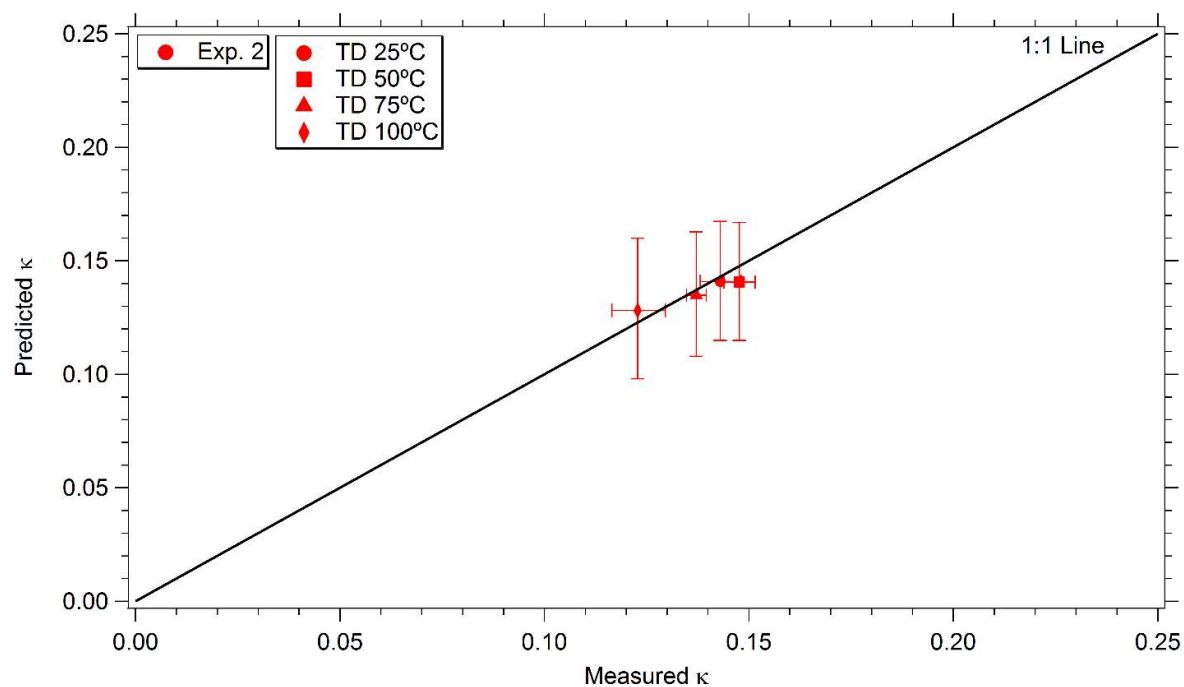

**Figure S15.** The predicted versus measured  $\kappa$ 's for Experiment 2 using the  $\kappa$  distribution in Fig. 7b for the three highest bins and the  $\kappa$  from the  $C^* = 0.01 \mu\text{g m}^{-3}$  bin in Fig. 10. The symbol indicates the TD temperature. The error bars for the predicted  $\kappa$ 's were obtained by predicting the  $\kappa$ 's using the  $\kappa$  distribution at  $\pm$  one standard deviation.
